# Supplementary material
Source: PubMed Central journal article supplement (PMC3847566)
Supplement: cr2013118x1.pdf [file cr2013118x1.pdf]

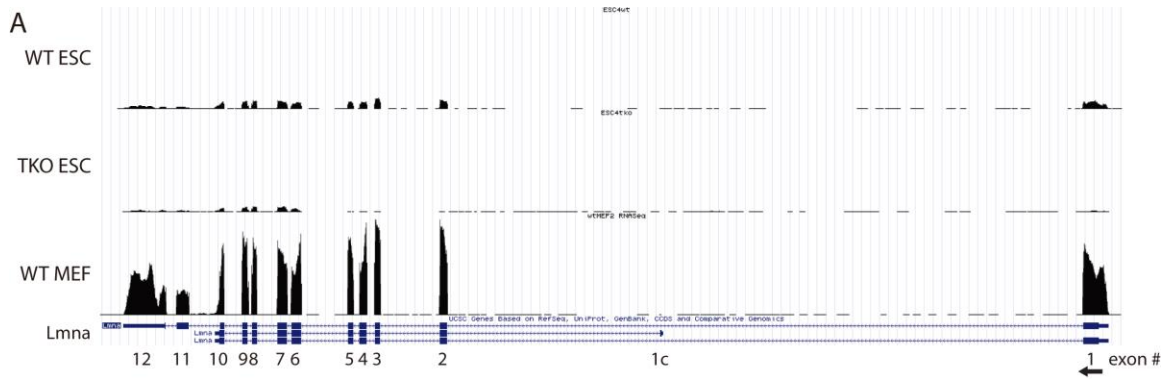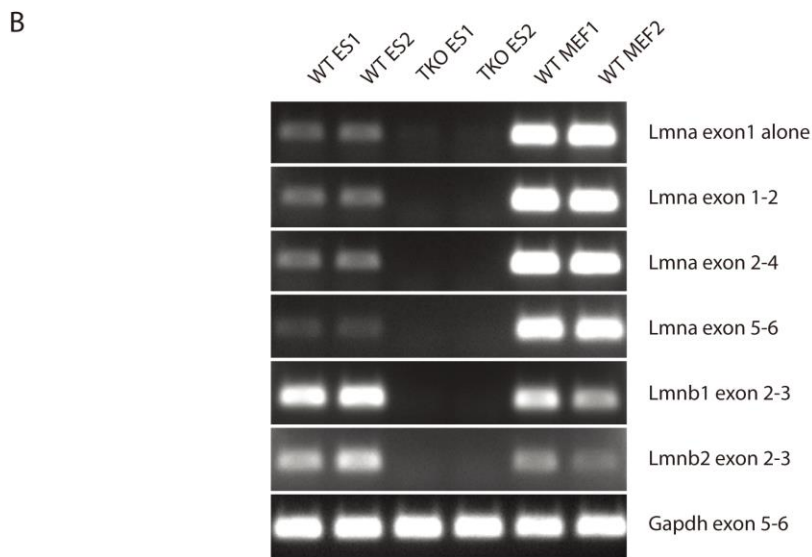

**Supplementary information, Figure S1** Analyses of *Lmna* transcripts in *Lmnb1*<sup>-/-</sup>; *Lmnb2*<sup>-/-</sup>; *Lmna*<sup>tm1/tm2</sup> (TKO) ESCs.

(A) The *Lmna* gene expression plot from whole genome RNA-sequencing of wild-type ESCs, TKO ESCs, and wild-type MEF. Diagrams of three different lamin-A isoforms were captured from the UCSC mouse genome browser. Numbers at the bottom of the panel represent the 12 exons of *Lmna*. Arrow indicates the direction of transcription. (B) Reverse transcriptase (RT) PCR of wild-type ESCs, TKO ESCs, and wild-type MEFs. Exon 1 of *Lmna* or exonal junctions as indicated was examined. WT, wild-type; TKO, *Lmna*, *Lmnb1*, and *Lmnb2* triple knockout. Numbers represent two biological repeats for each cell type.
