# Supplementary material
Source: PubMed Central journal article supplement (PMC3847566)
Supplement: cr2013118x2.pdf [file cr2013118x2.pdf]

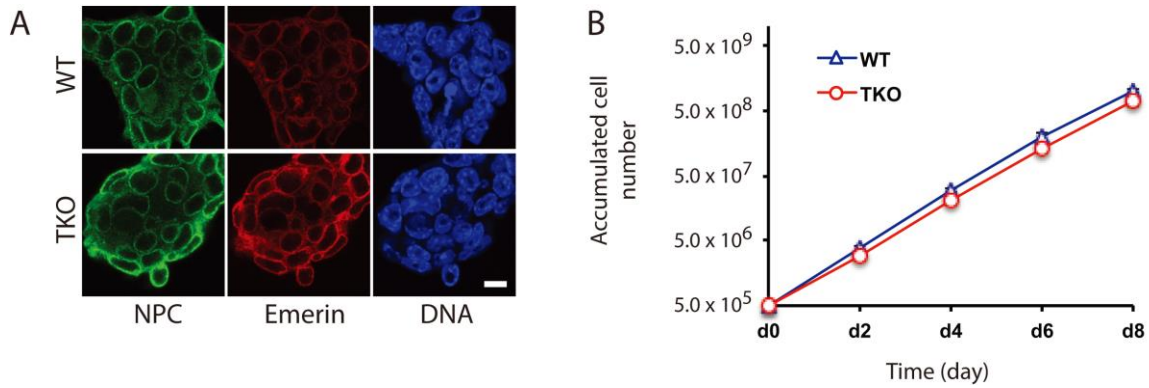

**Supplementary information, Figure S2** Characterization of *Lmnb1*<sup>-/-</sup>;*Lmnb2*<sup>-/-</sup>;

*Lmna*<sup>tm1/tm2</sup> ESCs.

(A) Immunofluorescence staining of ESCs with antibodies to nuclear envelope associated proteins . LA/C, lamin-A/C; LB1, lamin-B1; LB2, lamin-B2; NPC, nuclear pore complexes. DNA was counterstained with Hoechst dye. Scale bar, 10  $\mu$ m. (B) Analyses

of cell proliferation of *Lmnb1*<sup>+/+</sup>;*Lmnb2*<sup>+/+</sup>; *Lmna*<sup>+/+</sup> (WT) and *Lmnb1*<sup>-/-</sup>;*Lmnb2*<sup>-/-</sup>;

*Lmna*<sup>tm1/tm2</sup> (TKO) ESCs. Accumulated cell numbers are determined as described in the

Materials and Methods section. Error bars, standard deviation (SD, n = 4).
