# Supplementary material
Source: PubMed Central journal article supplement (PMC3847566)
Supplement: cr2013118x3.pdf [file cr2013118x3.pdf]

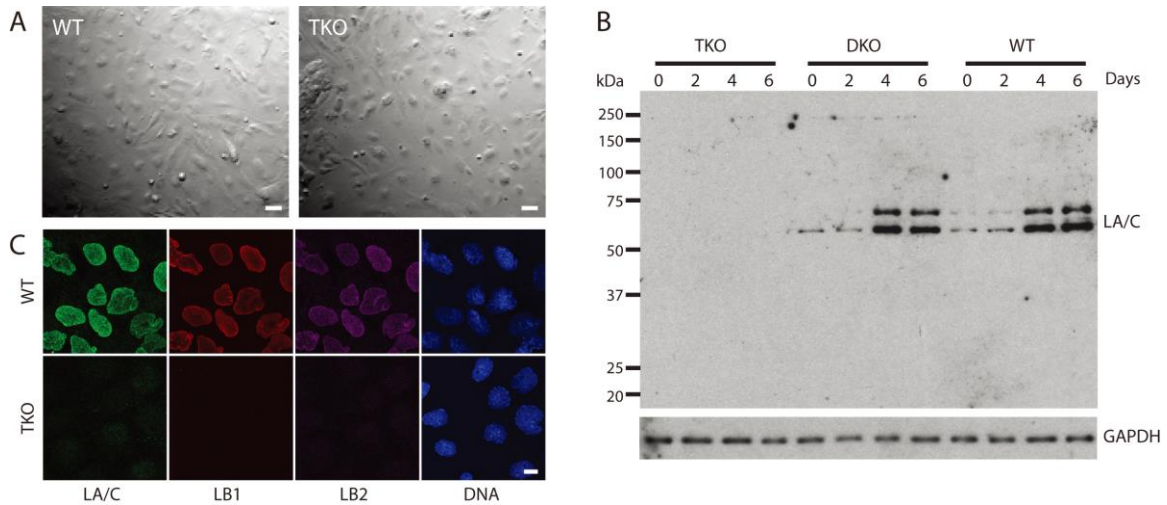

**Supplementary information, Figure S3** Differentiation of *Lmnb1*<sup>-/-</sup>;*Lmnb2*<sup>-/-</sup>;

*Lmna*<sup>tm1/tm2</sup> ESCs into fibroblasts.

(A) Bright field image of fibroblasts derived from wild-type or TKO ESCs. Scale bars, 20  $\mu$ m. (B) Western blotting analyses of lamin-A/C during differentiation into fibroblasts. Number of days post LIF withdrawal is indicated at the top of the panel. GAPDH was used as a loading control. TKO, DKO and WT represent *Lmnb1*<sup>-/-</sup>;*Lmnb2*<sup>-/-</sup>; *Lmna*<sup>tm1/tm2</sup>, *Lmnb1*<sup>-/-</sup>;*Lmnb2*<sup>-/-</sup>; *Lmna*<sup>+/+</sup>, and *Lmnb1*<sup>+/+</sup>;*Lmnb2*<sup>+/+</sup>; *Lmna*<sup>+/+</sup> cells, respectively. (C) Immunofluorescence staining of fibroblasts with antibodies to lamins. LA/C, lamin-A/C; LB1, lamin-B1; LB2, lamin-B2. Scale bar, 10  $\mu$ m.
