# Supplementary material
Source: PubMed Central journal article supplement (PMC3847566)
Supplement: cr2013118x4.pdf [file cr2013118x4.pdf]

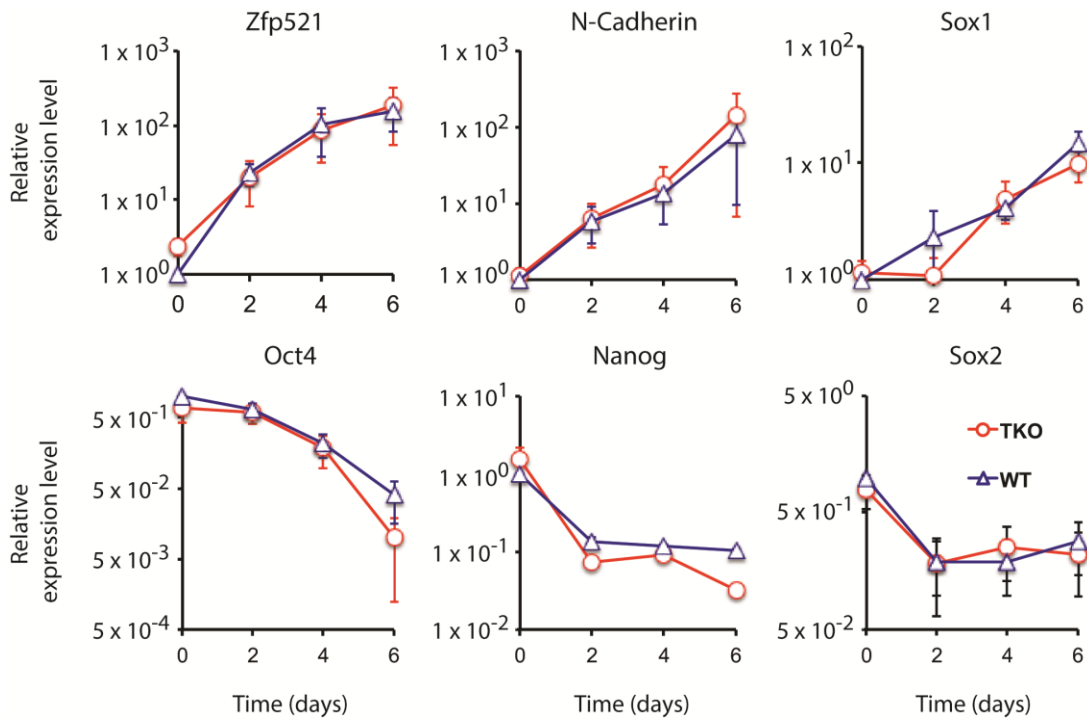

**Supplementary information, Figure S4** Differentiation of *Lmnb1*<sup>-/-</sup>;*Lmnb2*<sup>-/-</sup>;

*Lmna*<sup>tm1/tm2</sup> ESCs into neural lineages.

Measurements of expression of genes encoding selected neural lineage and ESC markers, using q-PCR as *Lmnb1*<sup>-/-</sup>;*Lmnb2*<sup>-/-</sup>; *Lmna*<sup>tm1/tm2</sup> (TKO) and *Lmnb1*<sup>+/+</sup>;*Lmnb2*<sup>+/+</sup>; *Lmna*<sup>+/+</sup> (WT) ESCs differentiated into a neural lineage. All values were normalized by GAPDH amounts. Error bars, SD (n = 2).
