# Supplementary material
Source: PubMed Central journal article supplement (PMC3847566)
Supplement: cr2013118x5.pdf [file cr2013118x5.pdf]

**Supplementary information, Table S1** Karyotypic analyses of lamin-null ESCs

|                          | P10       |           | P18       |           | P26       |           |
|--------------------------|-----------|-----------|-----------|-----------|-----------|-----------|
|                          | TKO       | WT        | TKO       | WT        | TKO       | WT        |
|                          | 40        | 40        | 40        | 39        | 40        | 40        |
|                          | 40        | 40        | 40        | 40        | 40        | 40        |
|                          | 40        | 40        | 39        | 39        | 40        | 40        |
|                          | 41        | 40        | 41        | 39        | 40        | 40        |
|                          | 40        | 40        | 40        | 40        | 40        | 44        |
|                          | 40        | 40        | 40        | 41        | 40        | 40        |
|                          | 40        | 40        | 40        | 40        | 40        | 39        |
|                          | 40        | 41        | 40        | 40        | 38        | 40        |
|                          | 40        | 40        | 40        | 40        | 40        | 40        |
|                          | 40        | 40        | 40        | 38        | 40        | 40        |
|                          | 40        | 40        | 40        | 40        | 40        | 40        |
|                          | 40        | 39        | 40        | 40        | 40        | 40        |
|                          | 38        | 40        | 40        | 40        | 40        | 40        |
|                          | 39        | 40        | 40        | 40        | 40        | 40        |
|                          | 40        | 40        | 39        | 40        | 40        | 40        |
|                          | 40        | 41        | 40        | 40        | 38        | 40        |
|                          | 40        | 40        | 40        | 40        | 40        | 41        |
|                          | 39        | 39        | 40        | 40        | 40        | 40        |
|                          | 40        | 40        | 40        | 40        | 40        | 40        |
|                          | 40        | 39        | 40        | 39        | 40        | 40        |
|                          | 40        | 40        | 40        | 38        | 40        | 40        |
|                          | 39        | 40        | 40        | 40        | 40        | 40        |
|                          | 40        | 40        | 38        | 40        | 40        | 40        |
|                          | 40        | 40        | 40        | 42        | 39        | 40        |
|                          | 40        | 40        | 40        | 40        | 40        | 40        |
| <b>euploid cells (%)</b> | <b>80</b> | <b>80</b> | <b>84</b> | <b>68</b> | <b>88</b> | <b>88</b> |

*Lmnb1*<sup>-/-</sup>; *Lmnb2*<sup>-/-</sup>; *Lmna*<sup>tm1/tm2</sup> (TKO) and *Lmnb1*<sup>+/+</sup>; *Lmnb2*<sup>+/+</sup>; *Lmna*<sup>+/+</sup> (WT) ESCs were karyotyped at the indicated number of passages. The karyotype number was determined by analyzing 25 different cells of each genotype and passage. The percentages of correct karyotypes (euploid cells) are indicated.
